# Supplementary material
Source: publisher site journal article supplement (https://www.dovepress.com/article/388432)
Supplement: Supplementary file 1 [file get_supplementary_file.php]

# Supplementary Data

## Appendix A

Questionnaire „Making SDM a reality” project

|  | Do not agree at all | Rather do not agree | Rather agree | Fully agree |
|--|---------------------|---------------------|--------------|-------------|
|--|---------------------|---------------------|--------------|-------------|

### PICS – Doctor facilitation scale (DFS)

|                                                                                       |                          |                          |                          |                          |
|---------------------------------------------------------------------------------------|--------------------------|--------------------------|--------------------------|--------------------------|
| My doctor asked me whether I agree with his/her decisions.                            | <input type="checkbox"/> | <input type="checkbox"/> | <input type="checkbox"/> | <input type="checkbox"/> |
| My doctor gave me a complete explanation for my medical symptoms or treatment         | <input type="checkbox"/> | <input type="checkbox"/> | <input type="checkbox"/> | <input type="checkbox"/> |
| My doctor asked me what I believe is causing my medical symptoms                      | <input type="checkbox"/> | <input type="checkbox"/> | <input type="checkbox"/> | <input type="checkbox"/> |
| My doctor encouraged me to talk about personal concerns related to my medical symptom | <input type="checkbox"/> | <input type="checkbox"/> | <input type="checkbox"/> | <input type="checkbox"/> |
| My doctor encouraged me to give my opinion about my medical treatment                 | <input type="checkbox"/> | <input type="checkbox"/> | <input type="checkbox"/> | <input type="checkbox"/> |

### PICS – Patient Information Scale (PIS)

|                                                                                 |                          |                          |                          |                          |
|---------------------------------------------------------------------------------|--------------------------|--------------------------|--------------------------|--------------------------|
| I asked my doctor to explain the treatment or procedure to me in greater detail | <input type="checkbox"/> | <input type="checkbox"/> | <input type="checkbox"/> | <input type="checkbox"/> |
| I asked my doctor for recommendations about my medical symptoms                 | <input type="checkbox"/> | <input type="checkbox"/> | <input type="checkbox"/> | <input type="checkbox"/> |
| I went into great detail about my medical symptoms                              | <input type="checkbox"/> | <input type="checkbox"/> | <input type="checkbox"/> | <input type="checkbox"/> |
| I asked my doctor a lot of questions about my medical symptoms                  | <input type="checkbox"/> | <input type="checkbox"/> | <input type="checkbox"/> | <input type="checkbox"/> |

### PICS – Patient Decision Making Scale (PDM)

|                                                                            |                          |                          |                          |                          |
|----------------------------------------------------------------------------|--------------------------|--------------------------|--------------------------|--------------------------|
| I expressed my needs and concerns that I had about the treatment.          | <input type="checkbox"/> | <input type="checkbox"/> | <input type="checkbox"/> | <input type="checkbox"/> |
| I gave my opinion on the test or treatment I would prefer for my condition | <input type="checkbox"/> | <input type="checkbox"/> | <input type="checkbox"/> | <input type="checkbox"/> |
| I discussed certain tests or treatment again with my doctor                | <input type="checkbox"/> | <input type="checkbox"/> | <input type="checkbox"/> | <input type="checkbox"/> |

I gave my opinion on the treatments and tests that the doctor wanted to perform

I have participated in important decisions regarding my diagnosis and treatment

collaboRATE

**Some questions about the support you received from your doctor during your consultation**

**Thinking about your consultation at the University hospital named above...**

1. ... How much effort was made to help you understand your health issues?

|                          |                          |                          |                          |                          |                          |                          |                          |                          |                          |
|--------------------------|--------------------------|--------------------------|--------------------------|--------------------------|--------------------------|--------------------------|--------------------------|--------------------------|--------------------------|
| 0                        | 1                        | 2                        | 3                        | 4                        | 5                        | 6                        | 7                        | 8                        | 9                        |
| <input type="checkbox"/> |

No effort made

Every effort was made

2. ... How much effort was made to listen to the things that matter most to you about your health issues?

|                          |                          |                          |                          |                          |                          |                          |                          |                          |                          |
|--------------------------|--------------------------|--------------------------|--------------------------|--------------------------|--------------------------|--------------------------|--------------------------|--------------------------|--------------------------|
| 0                        | 1                        | 2                        | 3                        | 4                        | 5                        | 6                        | 7                        | 8                        | 9                        |
| <input type="checkbox"/> |

No effort made

Every effort was made

3. ... How much effort was made to include what matters most to you in choosing what to do next?

|                          |                          |                          |                          |                          |                          |                          |                          |                          |                          |
|--------------------------|--------------------------|--------------------------|--------------------------|--------------------------|--------------------------|--------------------------|--------------------------|--------------------------|--------------------------|
| 0                        | 1                        | 2                        | 3                        | 4                        | 5                        | 6                        | 7                        | 8                        | 9                        |
| <input type="checkbox"/> |

No effort made

Every effort was made

## Preparation for Decision Making Scale (PrepDM)

### Some questions about your preparation on the decision making

Please indicate how helpful you found the information you received in the run-up to the above-mentioned decision-making at the University Hospital (UKSH).

#### Did the information you received at the university hospital...

|    |                                                                 | Not at all               | A little                 | some-<br>what            | Quite a<br>bit           | A<br>great<br>deal       |
|----|-----------------------------------------------------------------|--------------------------|--------------------------|--------------------------|--------------------------|--------------------------|
| 1  | make you recognize decision needs to be made                    | <input type="checkbox"/> |
| 2  | prepare you to make a better decision                           | <input type="checkbox"/> |
| 3  | make you think about pros and cons of each option               | <input type="checkbox"/> |
| 4  | help you think about which pros and cons are most important     | <input type="checkbox"/> |
| 5  | help you know that decision depends on what matters most to you | <input type="checkbox"/> |
| 6  | organize your own thoughts about decision                       | <input type="checkbox"/> |
| 7  | help you to think about how involved you want to be in decision | <input type="checkbox"/> |
| 8  | help you identify questions you want to ask                     | <input type="checkbox"/> |
| 9  | prepare you to talk to your doctor about what matters most      | <input type="checkbox"/> |
| 10 | prepare you for a follow up visit with your doctor              | <input type="checkbox"/> |

## **Appendix B**

Link to 3 demo versions of decision aids of the project

<https://demo.share-to-care.de/>

Benutzername: T01-demouser-1022

Passwort: qiG2JZpc
